# Supplementary material
Source: MDPI journal article supplement (https://www.mdpi.com/2073-4344/12/10/1242)
Supplement: s1 [file s1]

### Supporting Information

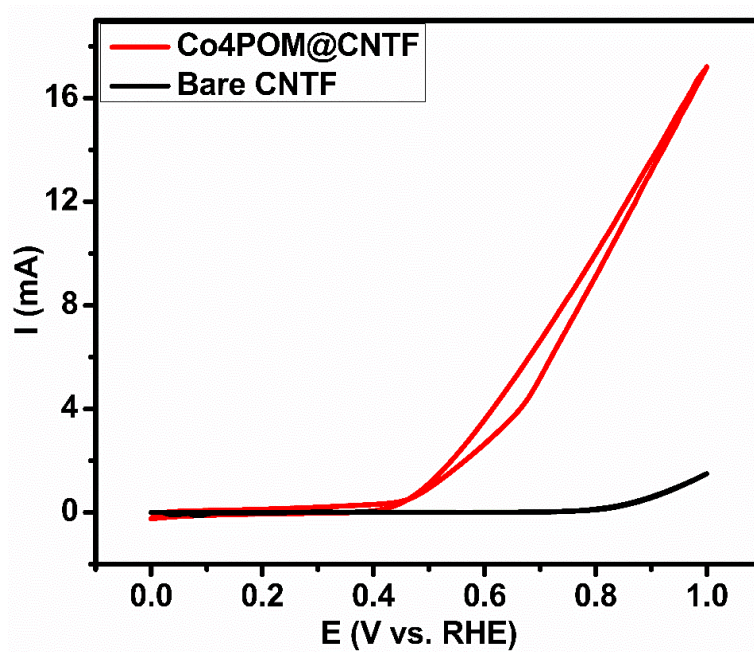

**Figure S1.** CV curves of bare CNTF and Co<sub>4</sub>POM@CNTF in 0.1 M KOH at a scan rate of 10 mV s<sup>-1</sup>

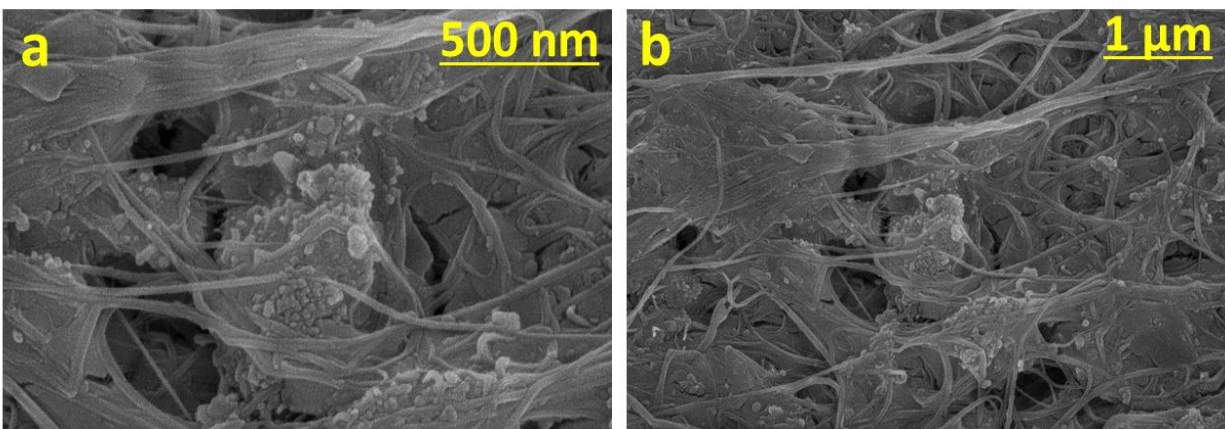

**Figure S2.** Post catalytic SEM images of Co<sub>4</sub>POM@CNTF at a) higher and b) lower magnification.

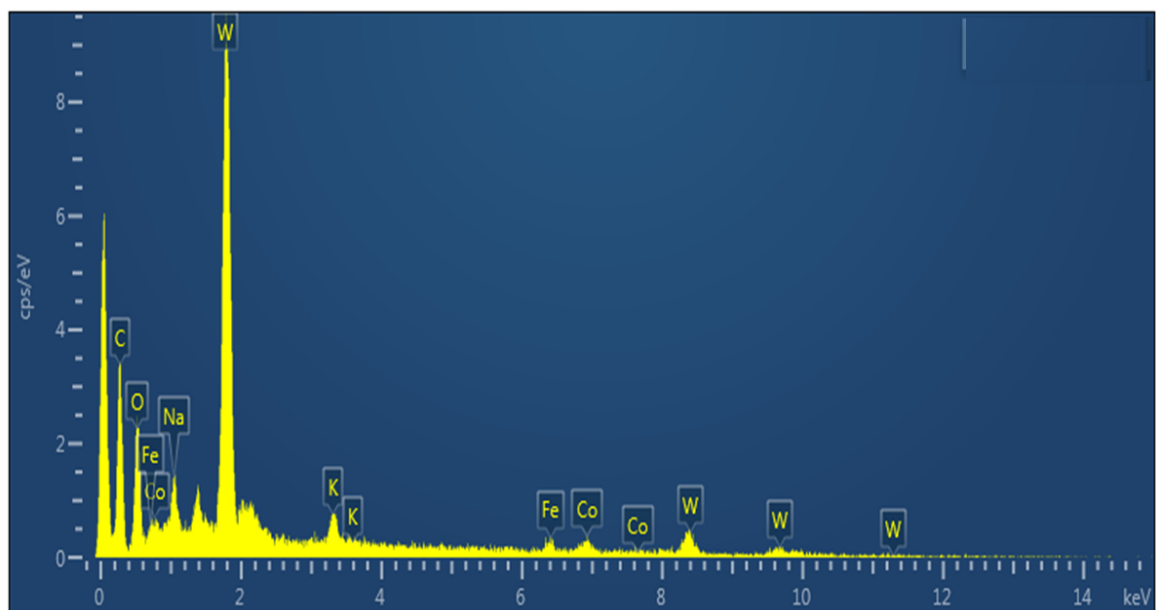

**Figure S3.** EDX spectrum of CO<sub>4</sub>POM@CNTF after chronoamperometric stability test.

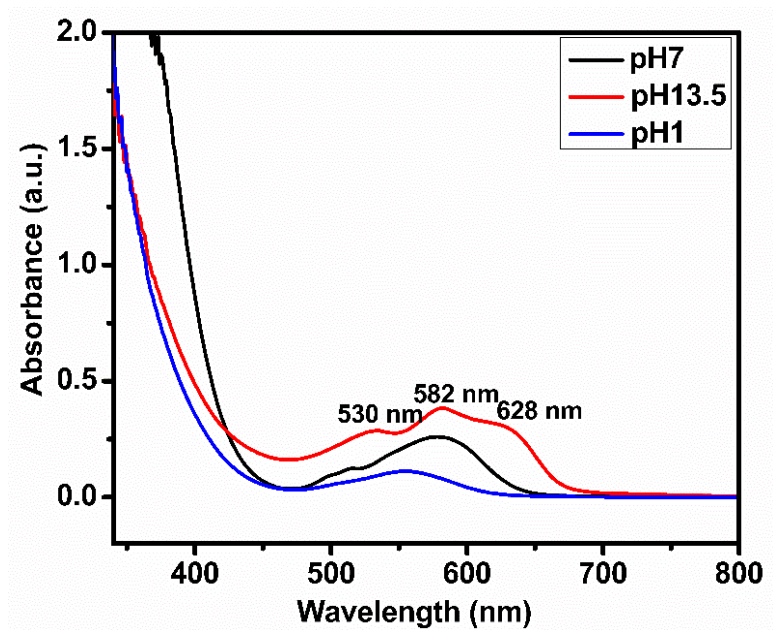

**Figure S4.** UV-Vis spectra of Co<sub>4</sub>POM in different pH aqueous solutions.

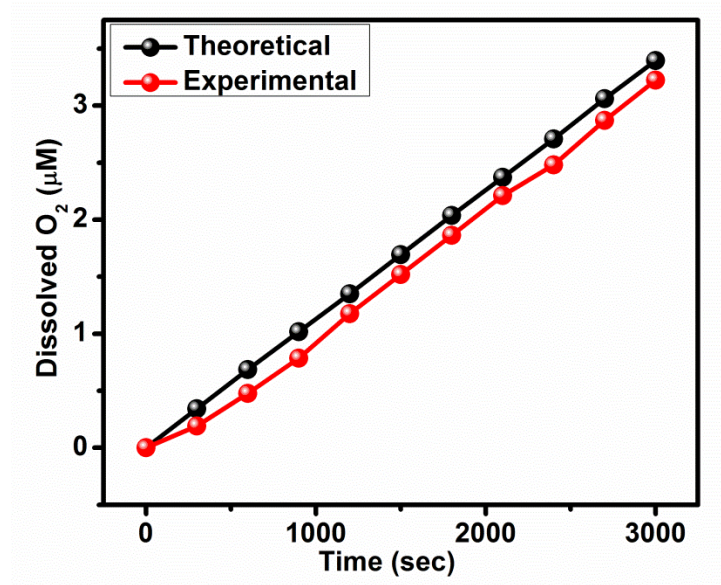

**Figure S5.** The Faradic efficiency of Co<sub>4</sub>POM@CNTF in 0.1M KOH at 1.55 V against RHE

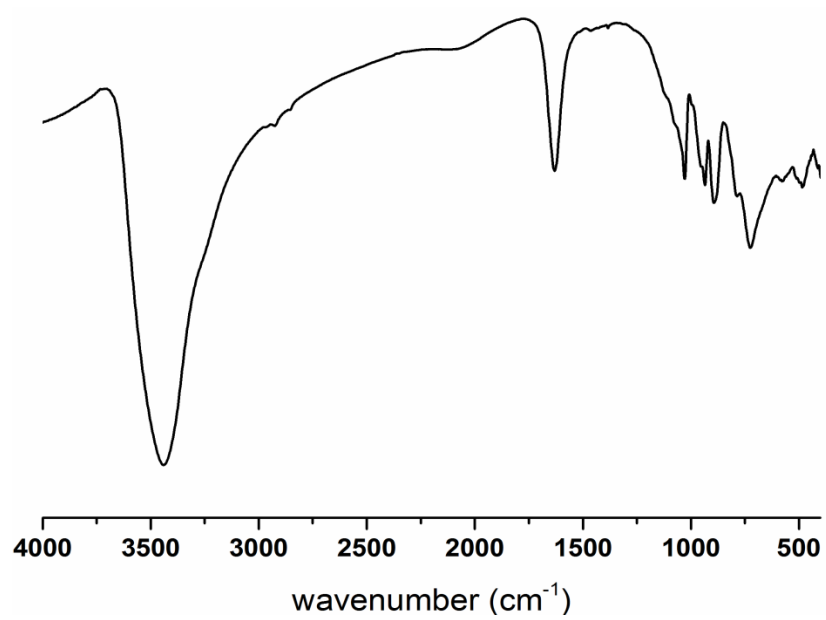

**Figure S6.** FT-IR spectrum of synthesized Co<sub>4</sub>POM.

**Table S1.** Comparative OER performance of Co-based heterogeneous electrocatalysts in basic media

| Catalyst                                               | Support       | Overpotential<br>(mV)<br>@ 10 mA.cm <sup>-2</sup> | Tafel slope<br>(mV dec <sup>-1</sup> ) | References      |
|--------------------------------------------------------|---------------|---------------------------------------------------|----------------------------------------|-----------------|
| Mesoporous Co <sub>2</sub> O <sub>3</sub>              | Glassy Carbon | 526                                               | -                                      | [1]             |
| NiCo <sub>2</sub> S <sub>4</sub> NW/NF                 | Ni Foam       | 260                                               | 40                                     | [2]             |
| NiCo-POM@NiF                                           | Ni Foam       | 360                                               | 126                                    | [3]             |
| W-CoMoO <sub>4</sub>                                   | FTO           | 680                                               | 106                                    | [4]             |
| Co <sub>2</sub> P@Co <sub>2</sub> P/CoPOM@NiF          | Ni Foam       | 336@50                                            | 57@200                                 | [5]             |
| ZIF-8@ZIF-67@POM                                       | Glassy carbon | 490                                               | 88                                     | [6]             |
| yolk/shell ZIF-67@POM                                  | Glassy carbon | 287                                               | 58                                     | [7]             |
| PBA@POM                                                | Ni Foam       | 440                                               | 23.45                                  | [8]             |
| (Co <sub>x</sub> Mn <sub>3-x</sub> )O <sub>4</sub>     | Glassy Carbon | 450                                               | 35.8                                   | [9]             |
| activated<br>Co <sub>4</sub> POM@TiO <sub>2</sub> @PEI | Carbon paper  | 490                                               | 60                                     | [10]            |
| Co <sub>16</sub> -GeW <sub>9</sub> @NiF                | Ni Foam       | 370                                               | 84                                     | [11]            |
| <b>Co<sub>4</sub>POM@CNTF</b>                          | <b>CNTF</b>   | <b>323</b>                                        | <b>69</b>                              | <b>Our work</b> |

#### Calculations of surface area of CNTF and RF

**SEM image of fiber show that diameter of fiber is 90  $\mu\text{m}$ .**

**Surface area of CNTF=  $2 \pi r h$**

**Where, r is the radius and h is the length of the fiber.**

$$r = d/2$$

$$= 90/2 \mu\text{m}$$

$$r = 45 \mu\text{m} = 0.0045 \text{ cm}$$

$$h = 2$$

**By putting the value of 'r' and 'h' in above equation**

$$= 2 \times 3.14 \times 0.0045 \times 2$$

$$\text{Surface area of CNTF} = 0.056 \text{ cm}^2$$

**Moreover,**

$$\text{RF} = \text{ECSA/surface area of CNTF}$$



## References

1. Grewe, T.; Deng, X.; Tüysüz, X. Influence of Fe doping on structure and water oxidation activity of nanocast Co<sub>3</sub>O<sub>4</sub>. *Chem. Mater.* **2014**, *26*, 3162-3168.
2. Sivanantham, A.; Ganesan, P.; Shanmugam, S. Hierarchical NiCo<sub>2</sub>S<sub>4</sub> nanowire arrays supported on Ni foam: an efficient and durable bifunctional electrocatalyst for oxygen and hydrogen evolution reactions, *Adv. Funct. Mater.* **2016**, *26*, 4661-4672.
3. Luo, W.; Hu, J.; Diao, H.; Schwarz, B.; Streb, C.; Song, Y. F. *Robust polyoxometalate/nickel foam composite electrodes for sustained electrochemical oxygen evolution at high pH*. *Angew. Chem. Int. Ed.* **2017**, *56*, 4941-4944.
4. Tantraviwat, D., Anuchai, S.; Ounnunkad, K.; Saipanya, S.; Aroonyadet, N.; Rujijanagul, G.; Inceesungvorn, B. Structural properties of tungsten-doped cobalt molybdate and its application in electrochemical oxygen evolution reaction. *J. Mater. Sci. Mater. Electron.*, **2018**, *29*, 13103-13111.
5. Zhang, L.; Ding, X.; Cong, M.; Wang, Y.; Zhang, X. Self-adaptive amorphous Co<sub>2</sub>P@Co<sub>2</sub>P/Co-polyoxometalate/nickel foam as an effective electrode for electrocatalytic water splitting in alkaline electrolyte. *Int. J. Hydrog. Energy*, **2019**, *44*, 9203-9209.
6. Wang, Y.; Wang, Y.; Zhang, L.; Liu, C. S.; Pang, H. Core-shell-type ZIF-8@ ZIF-67@ POM hybrids as efficient electrocatalysts for the oxygen evolution reaction. *Inorg. Chem. Front.*, **2019**, *6*, 2514-2520.
7. Li, Q. Y.; Zhang, L.; Xu, Y. X.; Li, Q.; Xue, H.; Pang, H. Smart yolk/shell ZIF-67@ POM hybrids as efficient electrocatalysts for the oxygen evolution reaction. *ACS Sustain. Chem. Eng.* **2019**, *7*, 5027-5033.
8. Wang, Y.; Wang, Y.; Zhang, L.; Liu, C. S.; Pang, H. PBA@ POM hybrids as efficient electrocatalysts for the oxygen evolution reaction. *Chem.: Asian J.* **2019**, *14*, 2790-2795.
9. Park, K. R.; Jeon, J. E.; Ali, G.; Ko, Y. H.; Lee, J.; Han, H.; Mhin, S. Oxygen evolution reaction of Co-Mn-O electrocatalyst prepared by solution combustion synthesis. *Catalysts* **2019**, *9*, 564.
10. Gong, R.; Gao, D.; Liu, R.; Sorsche, D.; Biskupek, J.; Kaiser, U. Rau, S.; Streb, C.; Self-activation of a polyoxometalate-derived composite electrocatalyst for the oxygen evolution reaction *ACS Appl. Energy Mater.* **2021**, *4*, 12671-12676.
11. Ahmed, T.; Asghar, M. A.; Ali, A.; Akhter, Z.; Ali, S.; Ullah, I.; Nisar, T.; Wagner, V.; Touseef, S.; Hussain, A.; Haider, A. High-nuclearity cobalt(II)-containing polyoxometalate anchored on nickel foam as electrocatalyst for electrochemical water oxidation studies. *J. Alloys Compd.* **2022**, *909*, 164709.
